# Supplementary material for: Polyacrylic acid-b-polystyrene-passivated CsPbBr3 perovskite quantum dots with high photoluminescence quantum yield for light-emitting diodes
Source: Royal Society of Chemistry journal article supplement (doi:10.1039/d2cc00051b), 2022-01-01
Supplement: d2cc00051b1.pdf [file d2cc00051b1.pdf]

## Electronic Supplementary Information

### **Poly acrylic acid-b-polystyrene -passivated CsPbBr<sub>3</sub> perovskite quantum dots with high photoluminescence quantum yield for light- emitting diodes**

Jianhua Shen,<sup>a</sup> Nan Meng,<sup>a</sup> Jianzhuang Chen,<sup>a</sup> Yihua Zhu,<sup>\*a</sup> Xiaoling Yang,<sup>\*a</sup> Yi Jia<sup>b</sup>  
and Chunzhong Li<sup>c</sup>

<sup>a</sup>Shanghai Engineering Research Centre of Hierarchical Nanomaterials, Key Laboratory for Ultrafine Materials of Ministry of Education, Frontiers Science Centre for Materiobiology and Dynamic Chemistry, School of Materials Science and Engineering, East China University of Science and Technology, Shanghai 200237, China.

<sup>b</sup>High Technology Research and Development Center, Ministry of Science and Technology of the People's Republic of China, Beijing, 100044 China.

<sup>c</sup>Shanghai Engineering Research Centre of Hierarchical Nanomaterials, School of Chemical Engineering, East China University of Science and Technology, Shanghai 200237, China.

\* Corresponding author. E-mail: yhzhu@ecust.edu.cn, xlyang@ecust.edu.cn

## **Supporting Experimental Section**

### **Materials**

Lead (II) bromide ( $\text{PbBr}_2$ , 99.9%), cesium bromide ( $\text{CsBr}$ , 99.999%), N, N-Dimethylformamide (DMF, > 99.8%), oleic acid (technical grade, 90%), and oleylamine (OAm, technical grade, 90%) were purchased from Aladdin Industrial Corporation, China. Hexane and toluene were purchased from Shanghai Titan Scientific Co., Ltd. All the reagents are directly used without further purification. Polyacrylic acid-b-polystyrene ( $\text{PAA}_{24}\text{-b-PS}_{206}$  and  $\text{PAA}_{24}\text{-b-PS}_{285}$ ) block copolymers were synthesized via sequential atomic transfer radical polymerization (ATRP) as previously reported<sup>[1,2]</sup>.

### **Synthesis of $\text{CsPbBr}_3$ PQDs and $\text{CsPbBr}_3@$ PAA-b-PS PQDs**

The precursor solution was obtained by first dissolving  $\text{PbBr}_2$  (0.4 mmol) and  $\text{CsBr}$  (0.4 mmol) in DMF (10 mL), followed by the adding of OAm (0.5 mL) and OA (1 mL) into the mixture. Then, it was stirred for half an hour to obtain a clear solution. After that, 0.25 mL precursor solution was quickly added into 5 mL toluene under vigorous stirring at 1500 rpm for 30 s to synthesize pure  $\text{CsPbBr}_3$  PQDs.  $\text{CsPbBr}_3@$ PAA-b-PS PQDs were synthesized by adding PAA-b-PS block polymer toluene solution into obtained fresh pure  $\text{CsPbBr}_3$  PQDs under vigorous stirring at 1500 rpm to achieve ligands exchange. A bright green solution could be immediately observed.

### **Fabrication of white light-emitting diodes (WLEDs)**

The green  $\text{CsPbBr}_3@$ PAA-b-PS PQDs powder and  $\text{K}_2\text{SiF}_6:\text{Mn}^{4+}$  phosphors were encapsulated into the epoxy resin adhesive. Then, the above mixture was put on the top of the red emissive layer. The optical properties of the fabricated white LED were evaluated by a temperature programmed LED optoelectronic analyzer with an integrating sphere spectroradiometer system (Everfine, ATA-500, Hangzhou, China). The white LED was operated under a current of 20 mA.

## Supplementary Figures

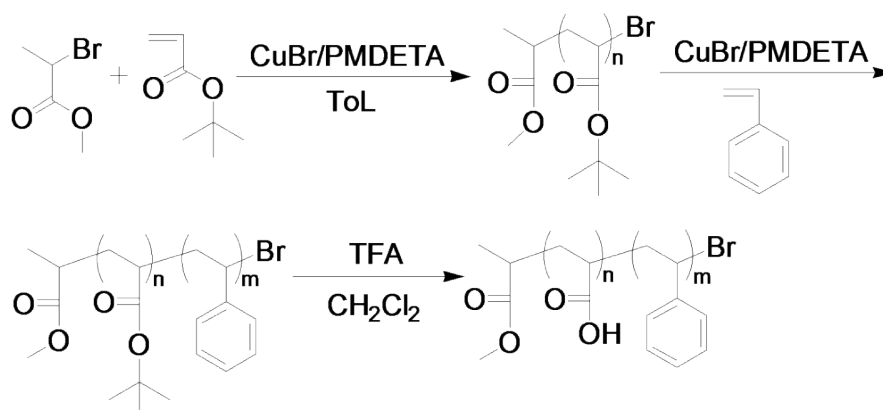

**Fig. S1.** Preparation of PAA-b-PS by sequential atom transfer radical polymerization (ATRP). Polyacrylic acid-b-polystyrene (PAA<sub>24</sub>-b-PS<sub>206</sub> and PAA<sub>24</sub>-b-PS<sub>285</sub>) block copolymers were synthesized via sequential atomic transfer radical polymerization (ATRP) as previously reported. Initially, tert-Butyl acrylate (tBA) was polymerized using CuBr complexed by N,N,N',N'',N''-pentamethyldiethylenetriamine (PMDETA) as the catalyst and methyl 2-bromopropionate (MBP) as the initiator. Furthermore, styrene was polymerized using the same catalyst and PtBA as the macroinitiator. Finally, hydrolysis led to the corresponding PAA-b-PS.

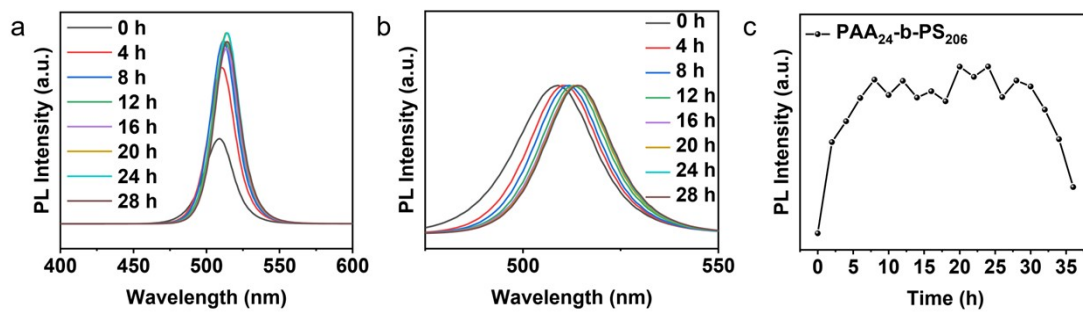

**Fig. S2.** (a) PL spectra of CsPbBr<sub>3</sub>@PAA<sub>24</sub>-b-PS<sub>206</sub> PQDs for different reaction times. (b) PL spectra of CsPbBr<sub>3</sub>@PAA<sub>24</sub>-b-PS<sub>206</sub> PQDs with different reaction times. (c) Variation of PL intensity with CsPbBr<sub>3</sub>@PAA<sub>24</sub>-b-PS<sub>206</sub> PQDs at different reaction times.

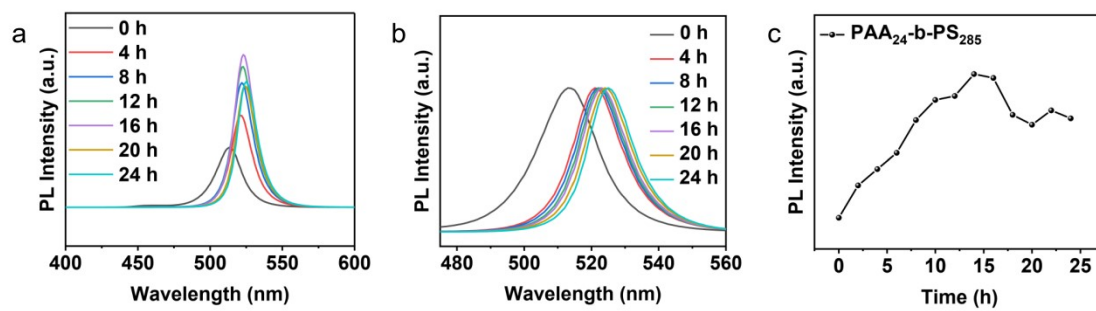

**Fig. S3.** (a) PL spectra of CsPbBr<sub>3</sub>@PAA<sub>24</sub>-b-PS<sub>285</sub> PQDs for different reaction times. (b) PL spectra of CsPbBr<sub>3</sub>@PAA<sub>24</sub>-b-PS<sub>285</sub> PQDs with different reaction times. (c) Variation of PL intensity with CsPbBr<sub>3</sub>@PAA<sub>24</sub>-b-PS<sub>285</sub> PQDs at different reaction times.

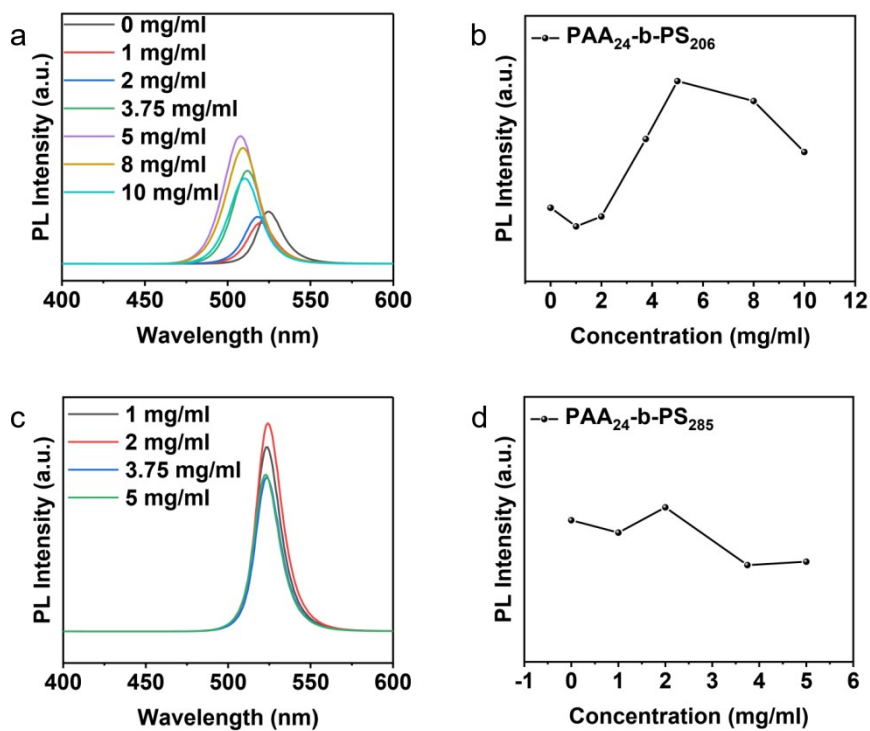

**Fig. S4.** (a) PL spectra of CsPbBr<sub>3</sub>@PAA<sub>24</sub>-b-PS<sub>206</sub> PQDs with different concentrations. (b) Variation of PL intensity with CsPbBr<sub>3</sub>@PAA<sub>24</sub>-b-PS<sub>206</sub> PQDs concentrations. (c) PL spectra of CsPbBr<sub>3</sub>@PAA<sub>24</sub>-b-PS<sub>285</sub> PQDs with different concentrations. (d) Variation of PL intensity with CsPbBr<sub>3</sub>@PAA<sub>24</sub>-b-PS<sub>285</sub> PQDs concentrations.

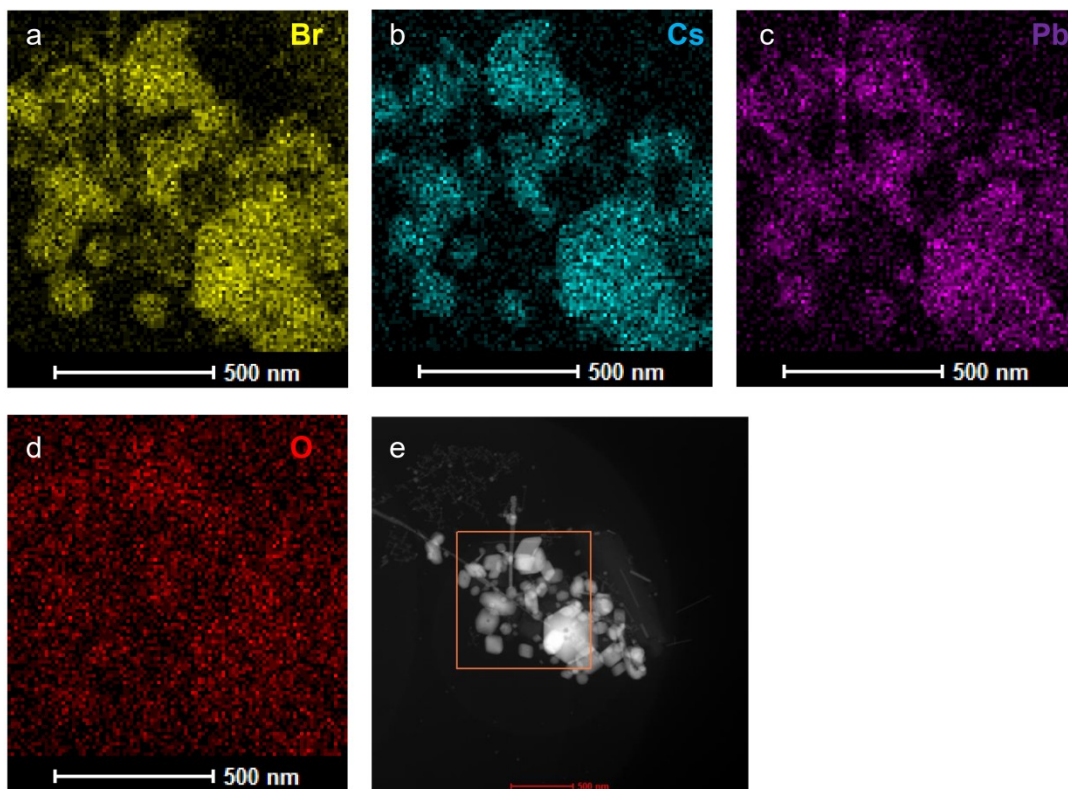

**Fig. S5.** EDX elemental mappings of (a) Br (yellow), (b) Cs (blue), (c) Pb (purple), and (d) O (red). (e) High-angle annular dark-field scanning TEM.

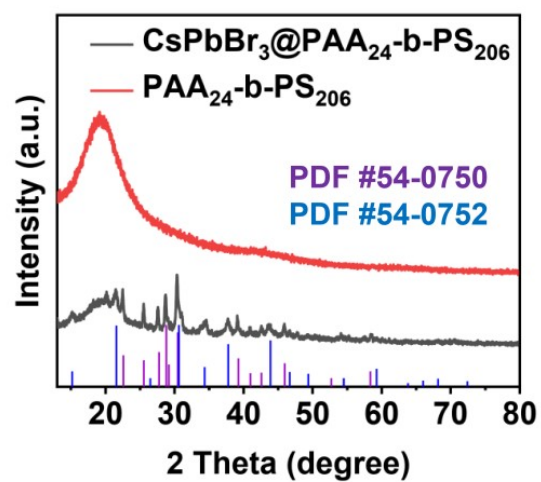

**Fig. S6.** XRD patterns of CsPbBr<sub>3</sub>@PAA<sub>24</sub>-b-PS<sub>206</sub> PQDs (black line) and PAA<sub>24</sub>-b-PS<sub>206</sub> (red line).



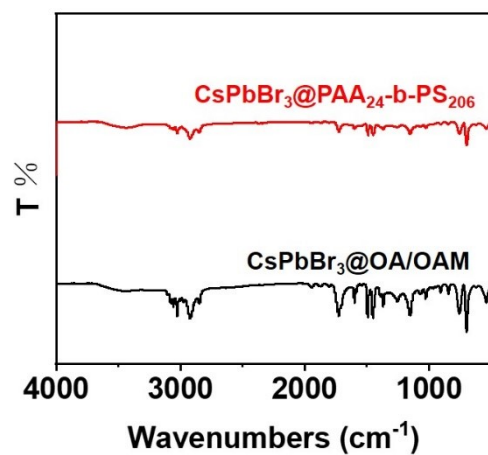

**Fig. S7.** FTIR images of CsPbBr<sub>3</sub>@PAA<sub>24</sub>-b-PS<sub>206</sub> PQDs (red line) and CsPbBr<sub>3</sub>@OA/OAM PQDs (black line) after reaction for 24 hours.

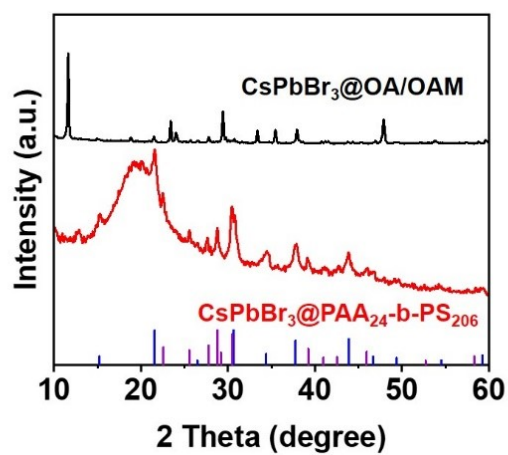

**Fig. S8.** XRD patterns of CsPbBr<sub>3</sub>@PAA<sub>24</sub>-b-PS<sub>206</sub> PQDs (red line) and pristine CsPbBr<sub>3</sub> PQDs (black line) after immersion in ethanol for 2 days.

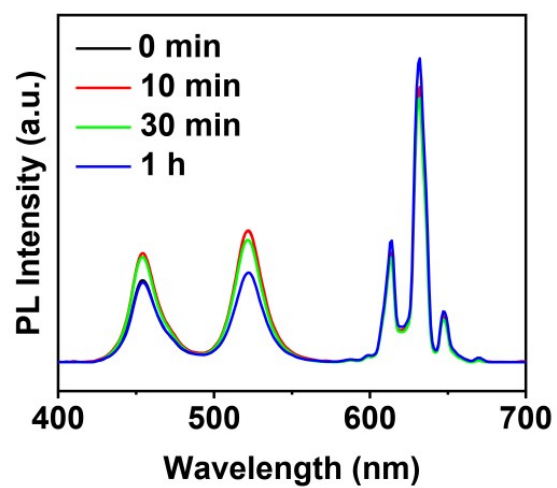

**Fig. S9.** White light-emitting diodes (WLEDs) PL images with different light times.

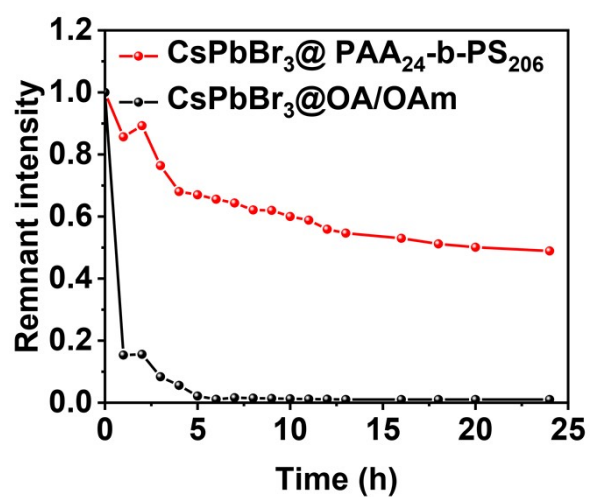

**Fig. S10.** Remnant PL values of CsPbBr<sub>3</sub>@OA/OAM and CsPbBr<sub>3</sub>@PAA<sub>24</sub>-b-PS<sub>206</sub> PQDs in water.

**Table S1.** Polymers and PQDs used in PQDs/polymer nanocomposites.

| Polymer/monomer                                                                     |                                 | PQDs                | PLQY (%) | Ref.      |
|-------------------------------------------------------------------------------------|---------------------------------|---------------------|----------|-----------|
| Poly acrylic acid- <i>b</i> -polystyrene                                            | PAA- <i>b</i> -PS               | CsPbBr <sub>3</sub> | 95       | This work |
| Polystyrene                                                                         | PS                              | CsPbX <sub>3</sub>  | 75       | [3]       |
|                                                                                     |                                 |                     | 44       | [4]       |
|                                                                                     |                                 |                     | 25       | [5]       |
|                                                                                     |                                 |                     | 68       | [6]       |
|                                                                                     |                                 |                     | 34       | [7]       |
|                                                                                     |                                 |                     | 48       | [8]       |
|                                                                                     |                                 |                     | 27       | [9]       |
|                                                                                     |                                 |                     | 79       | [10]      |
| Poly (ethylene glycol)                                                              | PEG                             | CsPbX <sub>3</sub>  | 41       | [11]      |
| Poly (ethylene oxide)                                                               | PEO                             | CsPbBr <sub>3</sub> | 60       | [12]      |
| Poly (vinylidene fluoride)                                                          | PVDF                            | CsPbBr <sub>3</sub> | 65       | [13]      |
| Poly (methyl methacrylate)                                                          | PMMA                            | CsPbX <sub>3</sub>  | 54       | [14]      |
|                                                                                     |                                 |                     | 45       | [15]      |
| Poly (lauryl methacrylate)                                                          | PLMA                            | CsPbBr <sub>3</sub> | 86       | [16]      |
| Poly(vinylpyrrolidone)                                                              | PVP                             | CsPbX <sub>3</sub>  | 55       | [17]      |
|                                                                                     |                                 |                     | 24       | [18]      |
| Poly (lactic acid)                                                                  | PLA                             | CsPbX <sub>3</sub>  | 90       | [19]      |
| Poly (maleic anhydride- <i>alt</i> -1-octadecene)                                   | PMAO                            | CsPbX <sub>3</sub>  | 88       | [20]      |
|                                                                                     |                                 |                     | 69       | [21]      |
|                                                                                     |                                 |                     | 88.8     | [22]      |
| Poly (isobutylene- <i>alt</i> -maleic anhydride)                                    | PIMA                            | CsPbBr <sub>3</sub> | 80       | [23]      |
| Ethyl cellulose                                                                     |                                 | CsPbBr <sub>3</sub> | 37.2     | [24]      |
| Diphenylvinylphosphine-styrene copolymer                                            | PDPEP- <i>co</i> -PS            | CsPbBr <sub>3</sub> | 90       | [25]      |
| Polystyrene- <i>block</i> -poly-2-vinylpyridine                                     | PS- <i>b</i> -P2VP              | CsPbX <sub>3</sub>  | 51       | [26]      |
| Poly (divinylbenzene)                                                               | PDVB                            | CsPbBr <sub>3</sub> | 60       | [27]      |
| Poly (ethylene vinyl acetate)                                                       | PEVA                            | CsPbBr <sub>3</sub> | 40.5     | [28]      |
| Star-like poly(acrylic acid)- <i>block</i> -polystyrene                             | PAA- <i>b</i> -PS               | CsPbBr <sub>3</sub> | 91.4     | [29]      |
|                                                                                     |                                 |                     | 71       | [30]      |
| Star-like polystyrene- <i>block</i> -poly (acrylic acid)- <i>block</i> -polystyrene | PS- <i>b</i> -PAA- <i>b</i> -PS | CsPbBr <sub>3</sub> | 67       | [30]      |
| Poly (ethylenimine)                                                                 | PEI                             | CsPbBr <sub>3</sub> | 75       | [31]      |
|                                                                                     |                                 |                     | 85       | [32]      |
| Polyimide                                                                           | PI                              | CsPbBr <sub>3</sub> | 88.1     | [33]      |
| Poly (2-(dimethylamino)ethylmethacrylate)                                           | PDMAEMA                         | CsPbBr <sub>3</sub> | 60       | [34]      |

**Table S2.** Comparisons with the CsPbBr<sub>3</sub> QDs-based WLEDs reported previously.

| Samples                                                                        | PLQY (%) | CCT (K) | CRI  | CIE coordinates (X, Y) | Ref.      |
|--------------------------------------------------------------------------------|----------|---------|------|------------------------|-----------|
| CsPbBr <sub>3</sub> @PAA <sub>24</sub> -b-PS <sub>206</sub> <sup>+</sup>       | 95       | 5464    | 65.5 | (0.3333, 0.3396)       | This work |
| K <sub>2</sub> SiF <sub>6</sub> :Mn <sup>4+</sup> (KSF) phosphors              |          |         |      |                        |           |
| CsPbBr <sub>3</sub> @ZrO <sub>2</sub> + CaAlSiN <sub>3</sub> :Eu <sup>2+</sup> | 80       | 4743    | NA   | (0.351, 0.346)         | [35]      |
| CsPbBr <sub>3</sub> @SiO <sub>2</sub> + Ag-In-Zn-S                             | 75       | 3689    | 91   | (0.4037, 0.411)        | [36]      |
| CsPbBr <sub>3</sub> : Na + KSF phosphors                                       | 85       | 6652    | 75.2 | (0.31, 0.33),          | [37]      |
| CsPbBr <sub>3</sub> /PMAO + nitride phosphors                                  | 88.8     | 3320    | NA   | (0.390, 0.332)         | [38]      |
| CsPbBr <sub>3</sub> + KSF phosphors                                            | 93       | 4574    | 85   | (0.34, 0.31)           | [39]      |
| CsPbBr <sub>3</sub> AeroPQDs + KSF phosphor                                    | 75.6     | 6500    | NA   | (0.31, 0.33)           | [40]      |

## References

- [1] Y. Kang, T. A. Taton, *Angew. Chem. Int. Ed.* 2005, 44, 409–412.
- [2] T. Azzam, A. Eisenberg, *Angew. Chem. Int. Ed.* 2006, 45, 7443–7447.
- [3] S. N. Raja, Y. Bekenstein, M. A. Koc, S. Fischer, D. Zhang, L. Lin, R. O. Ritchie, P. Yang, A. P. Alivisatos, *ACS Appl. Mater. Interfaces* 2016, 8, 35523.
- [4] Y. C. Wong, J. De Andrew Ng, Z. K. Tan, *Adv. Mater.* 2018, 30, 1800774.
- [5] S. Pathak, N. Sakai, F. Wisnivesky Rocca Rivarola, S. D. Stranks, J. Liu, G. E. Eperon, C. Ducati, K. Wojciechowski, J. T. Griffiths, A. A. Haghighirad, A. Pellaroque, R. H. Friend, H. J. Snaith, *Chem. Mater.* 2015, 27, 8066.
- [6] Y. Wei, X. Deng, Z. Xie, X. Cai, S. Liang, P. a. Ma, Z. Hou, Z. Cheng, J. Lin, *Adv. Funct. Mater.* 2017, 27, 1703535.
- [7] Y. Wang, J. He, H. Chen, J. Chen, R. Zhu, P. Ma, A. Towers, Y. Lin, A. J. Gesquiere, S. T. Wu, Y. Dong, *Adv. Mater.* 2016, 28, 10710.
- [8] H. Liao, S. Guo, S. Cao, L. Wang, F. Gao, Z. Yang, J. Zheng, W. Yang, *Adv. Opt. Mater.* 2018, 6, 1800346.
- [9] H. Zhang, X. Wang, Q. Liao, Z. Xu, H. Li, L. Zheng, H. Fu, *Adv. Funct. Mater.* 2017, 27, 1604382.
- [10] H. Kim, S. So, A. Ribbe, Y. Liu, W. Hu, V. V. Duzhko, R. C. Hayward, T. Emrick, *Chem. Commun.* 2019, 55, 1833.
- [11] Q.-B. Yan, N. Bao, S.-N. Ding, *J. Mater. Chem. B* 2019, 7, 4153.
- [12] Y. Ling, Y. Tian, X. Wang, J. C. Wang, J. M. Knox, F. Perez-Orive, Y. Du, L. Tan, K. Hanson, B. Ma, H. Gao, *Adv. Mater.* 2016, 28, 8983.
- [13] P. Liang, P. Zhang, A. Pan, K. Yan, Y. Zhu, M. Yang, L. He, *ACS Appl. Mater. Interfaces* 2019, 11, 22786.
- [14] A. Pan, J. Wang, M. J. Jurow, M. Jia, Y. Liu, Y. Wu, Y. Zhang, L. He, Y. Liu, *Chem. Mater.* 2018, 30, 2771.
- [15] K. Ma, X.-Y. Du, Y.-W. Zhang, S. Chen, *J. Mater. Chem. C* 2017, 5, 9398.
- [16] J. Tong, J. Wu, W. Shen, Y. Zhang, Y. Liu, T. Zhang, S. Nie, Z. Deng, *ACS Appl. Mater. Interfaces* 2019, 11, 9317.
- [17] L. Zhang, X. Yang, Q. Jiang, P. Wang, Z. Yin, X. Zhang, H. Tan, Y. M. Yang, M. Wei, B. R. Sutherland, E. H. Sargent, *Nat. Commun.* 2017, 8, 15640.
- [18] J. Hai, H. Li, Y. Zhao, F. Chen, Y. Peng, B. Wang, *Chem. Commun.* 2017, 53, 5400.
- [19] L. Rao, Y. Tang, C. Yan, J. Li, G. Zhong, K. Tang, B. Yu, Z. Li, J. Z. Zhang, *J. Mater. Chem. C* 2018, 6, 5375.

- [20] M. Meyns, M. Perálvarez, A. Heuer-Jungemann, W. Hertog, M. Ibáñez, R. Nafria, A. Genç, J. Arbiol, M. V. Kovalenko, J. Carreras, A. Cabot, A. G. Kanaras, *ACS Appl. Mater. Interfaces* 2016, 8, 19579.
- [21] D. Baranov, G. Caputo, L. Goldoni, Z. Dang, R. Scarfiello, L. De Trizio, A. Portone, F. Fabbri, A. Camposeo, D. Pisignano, L. Manna, *Chem. Sci.* 2020, 11, 3986.
- [22] H. Wu, S. Wang, F. Cao, J. Zhou, Q. Wu, H. Wang, X. Li, L. Yin, X. Yang, *Chem. Mater.* 2019, 31, 1936.
- [23] S. Wang, L. Du, Z. Jin, Y. Xin, H. Mattoussi, *J. Am. Chem. Soc.* 2020, 142, 12669.
- [24] Y. H. Song, J. S. Yoo, B. K. Kang, S. H. Choi, E. K. Ji, H. S. Jung, D. H. Yoon, *Nanoscale* 2016, 8, 19523.
- [25] W. Yang, L. Fei, F. Gao, W. Liu, H. Xu, L. Yang, Y. Liu, *Chem. Eng. J.* 2020, 387, 124180.
- [26] S. Hou, Y. Guo, Y. Tang, Q. Quan, *ACS Appl. Mater. Interfaces* 2017, 9, 18417.
- [27] T. Xuan, J. Huang, H. Liu, S. Lou, L. Cao, W. Gan, R.-S. Liu, J. Wang, *Chem. Mater.* 2019, 31, 1042.
- [28] Y. Li, Y. Lv, Z. Guo, L. Dong, J. Zheng, C. Chai, N. Chen, Y. Lu, C. Chen, *ACS Appl. Mater. Interfaces* 2018, 10, 15888.
- [29] Y. J. Yoon, Y. Chang, S. Zhang, M. Zhang, S. Pan, Y. He, C. H. Lin, S. Yu, Y. Chen, Z. Wang, Y. Ding, J. Jung, N. Thadhani, V. V. Tsukruk, Z. Kang, Z. Lin, *Adv. Mater.* 2019, 31, 1901602.
- [30] S. Pan, Y. Chen, Z. Wang, Y.-W. Harn, J. Yu, A. Wang, M. J. Smith, Z. Li, V. V. Tsukruk, J. Peng, Z. Lin, *Nano Energy* 2020, 77, 105043.
- [31] G. Jiang, C. Guhrenz, A. Kirch, L. Sonntag, C. Bauer, X. Fan, J. Wang, S. Reineke, N. Gaponik, A. Eychemüller, *ACS Nano* 2019, 13, 10386.
- [32] W. Yin, M. Li, W. Dong, Z. Luo, Y. Li, J. Qian, J. Zhang, W. Zhang, Y. Zhang, S. V. Kershaw, X. Zhang, W. Zheng, A. L. Rogach, *ACS Energy Lett.* 2021, 6, 477.
- [33] J. Zhang, P. Jiang, Y. Wang, X. Liu, J. Ma, G. Tu, *ACS Appl. Mater. Interfaces* 2019, 12, 3080.
- [34] A. Pan, L. Yan, X. Ma, Y. Wu, Y. Zhang, G. Zhou, L. He, *J. Alloys Compd.* 2020, 844, 156102.
- [35] Q. Mo, C. Chen, W. Cai, S. Zhao, D. Yan, Z. Zang, *Laser & Photonics Rev.* 2021, 15, 2100278.
- [36] H. Guan, S. Zhao, H. Wang, D. Yan, M. Wang, Z. Zang, *Nano Energy* 2020, 67, 104279.
- [37] S. Li, Z. Shi, F. Zhang, L. Wang, Z. Ma, D. Yang, Z. Yao, D. Wu, T. Xu, Y. Tian, Y. Zhang, C. Shan, X. Li, *Chem. Mater.* 2019, 31, 3917–3928.
- [38] H. Wu, S. Wang, F. Cao, J. Zhou, Q. Wu, H. Wang, X. Li, L. Yin, X. Yang, *Chem. Mater.* 2019, 31, 1936-1940.
- [39] H. Xu, J. Wang, T. Xuan, C. Lv, J. Hou, L. Zhang, Y. Dong, J. Shi, *Chem. Eng. J.* 2019, 364, 20.
- [40] Z. Li, C. Song, J. Li, G. Liang, L. Rao, S. Yu, X. Ding, Y. Tang, B. Yu, J. Ou, U. Lemmer, G. Gomard, *Adv.*



Mater. Technol.2020,5, 190094.
